# Supplementary material for: Impact of PM2.5 and PM10 Emissions on Changes of Their Concentration Levels in Lithuania: A Case Study
Source: MDPI journal article supplement (doi:10.3390/atmos13111793), 2022-10-29
Supplement: s1 [file s1]

Archive with 1 entries (1 files):
- atmosphere-1949726-supplementary.pdf
