# Supplementary material for: Impact of PM2.5 and PM10 Emissions on Changes of Their Concentration Levels in Lithuania: A Case Study
Source: MDPI journal article supplement (doi:10.3390/atmos13111793), 2022-10-29
Supplement: s1 [file s1 › atmosphere-1949726-supplementary.pdf]

# Impact of PM<sub>2.5</sub> and PM<sub>10</sub> Emissions on Changes of Their Concentration Levels in Lithuania: A Case Study

Steigvilė Byčenkienė <sup>1,\*</sup>, Abdullah Khan <sup>1</sup> and Vilma Bimbaitė <sup>2</sup>

<sup>1</sup> SRI Center for Physical Sciences and Technology, Saulėtekio ave. 3, LT-10257 Vilnius, Lithuania

<sup>2</sup> Environmental Protection Agency, A. Juozapavičiaus str. 9, LT-09311 Vilnius, Lithuania

\* Correspondence: steigvile.bycenkiene@ftmc.lt; Tel.: +37-068-262-087

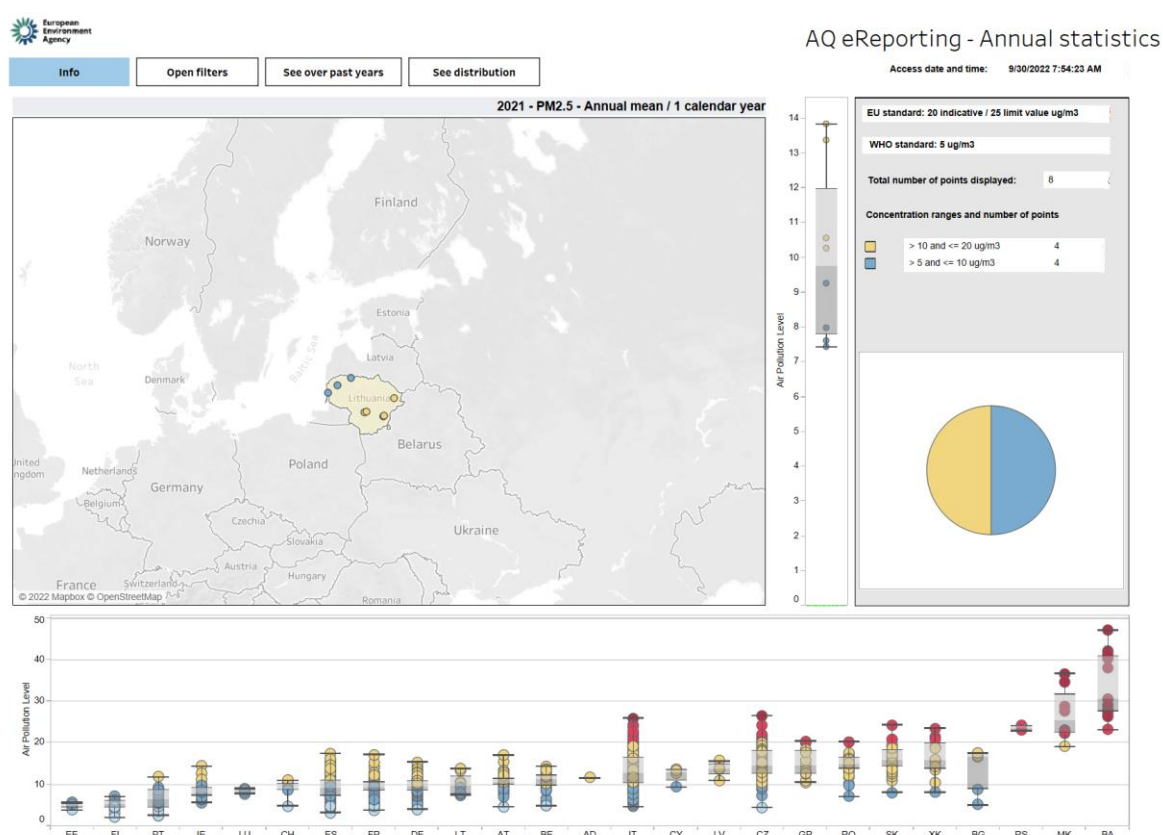

Figure S1. PM<sub>2.5</sub> annual mean in Lithuania and EU.

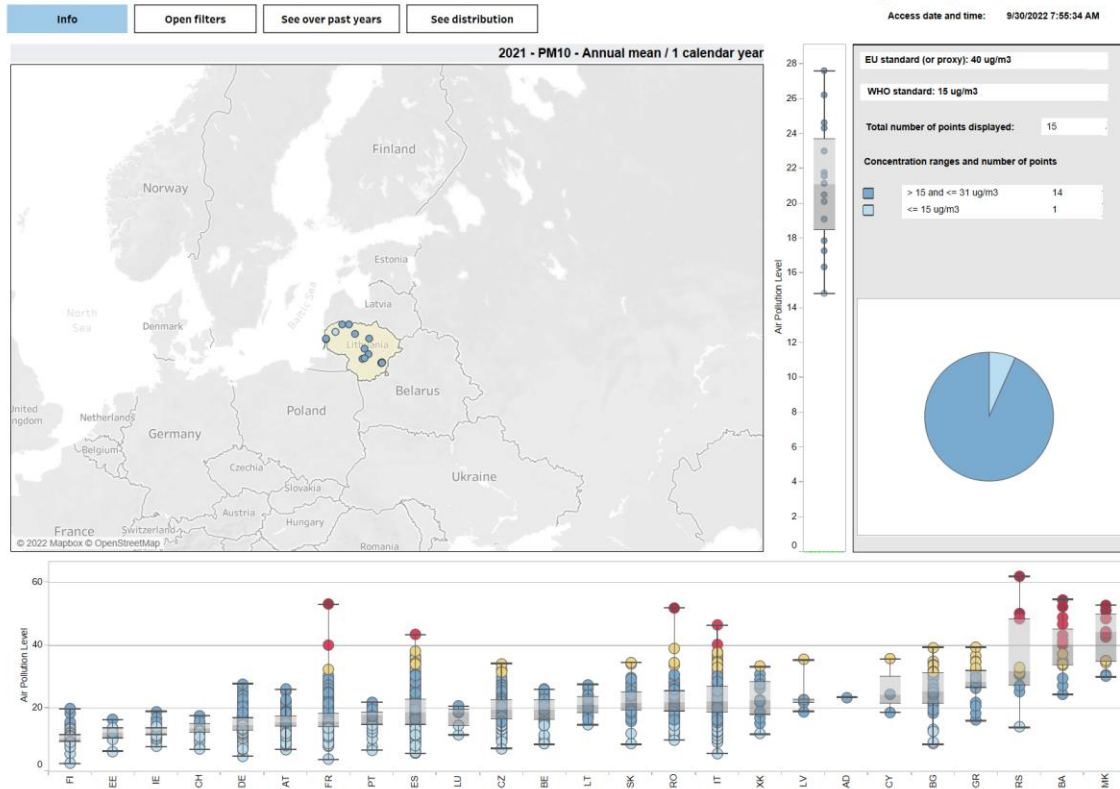

Figure S2. PM<sub>10</sub> annual mean in Lithuania and EU.
